# Supplementary material
Source: HighWire-hosted journal article supplement (https://rmdopen.bmj.com/content/8/2/e002706)
Supplement: inline-supplementary-material-1 [file inline-supplementary-material-1.pdf]

## SUPPLEMENTARY MATERIALS

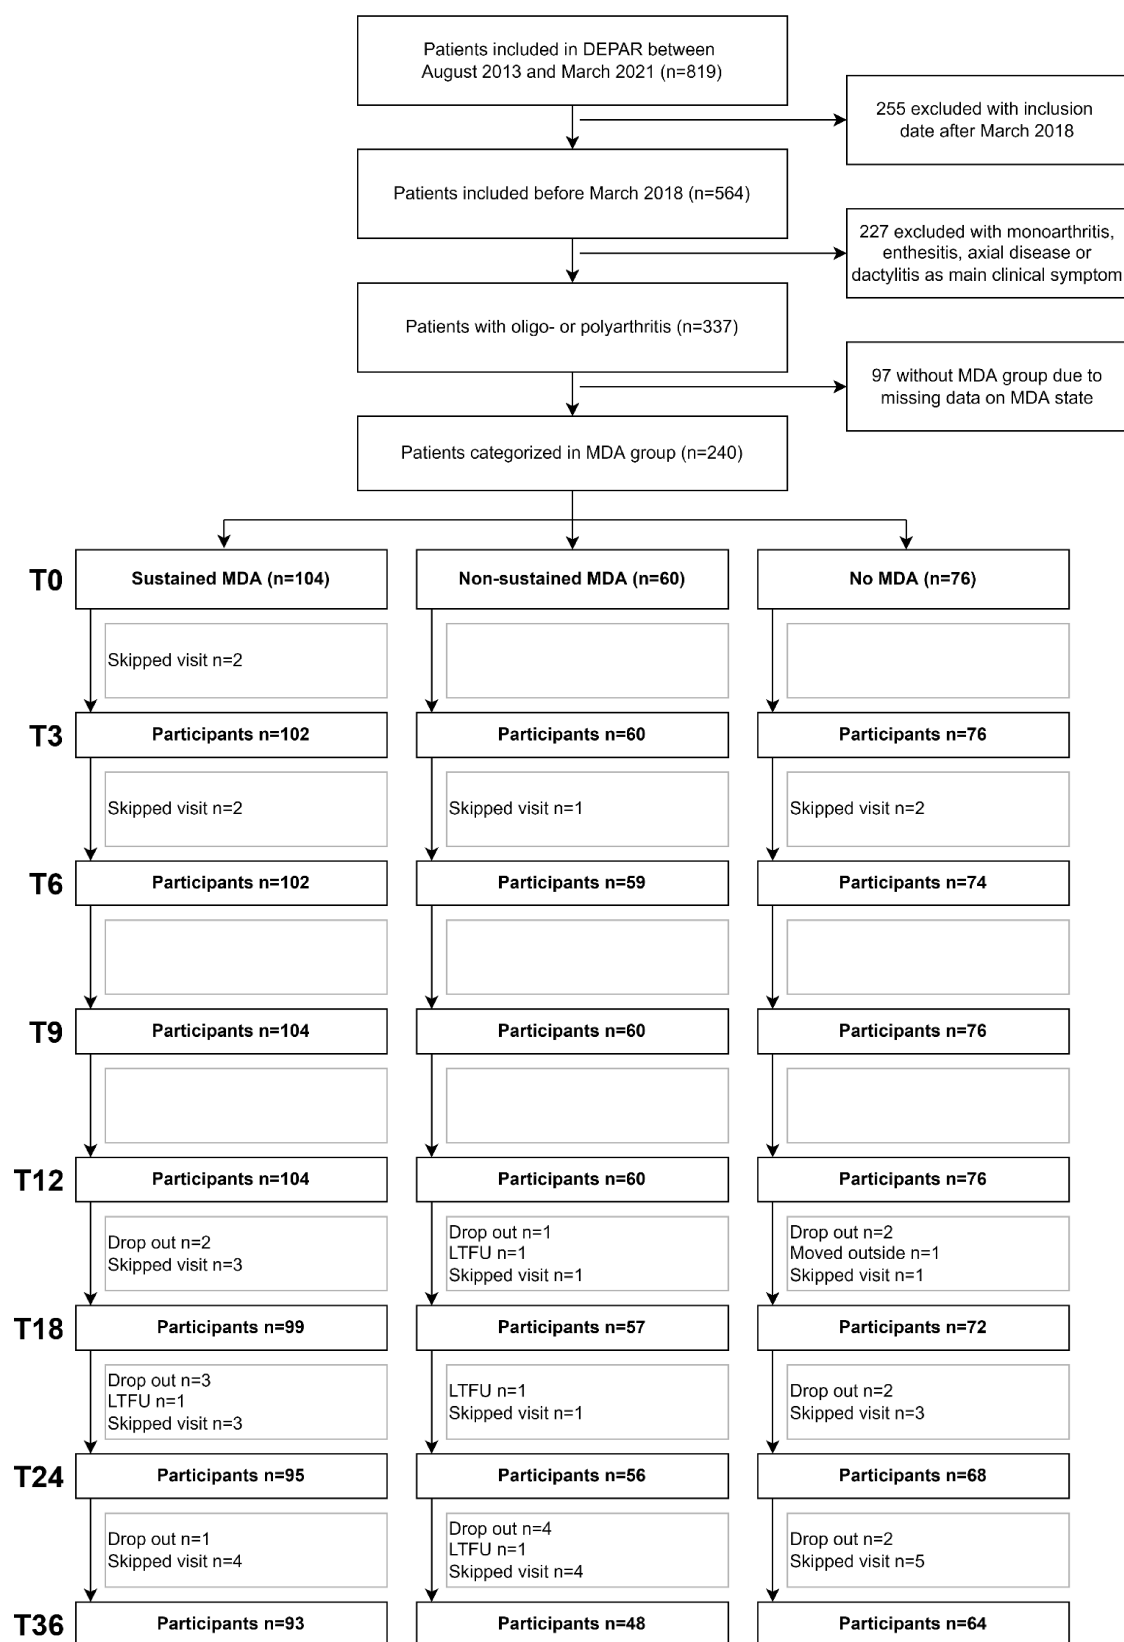

Supplementary Figure S1. Flowchart of minimal disease activity groups

Results are shown as number of patients. Drop-out rates were 6% [6/104] for sustained MDA, 8% [5/60] for non-sustained MDA and 8% [6/76] for no MDA. LTFU: loss to follow-up; MDA: minimal disease activity.

**Supplementary Table S1.** Baseline characteristics of study patients not categorized vs categorized in a MDA group

|                                         | No MDA group<br>assigned (n=97) | MDA group<br>assigned (n=240) | ANOVA<br>p-value |
|-----------------------------------------|---------------------------------|-------------------------------|------------------|
| <b>Demographic characteristics</b>      |                                 |                               |                  |
| Age (years), mean $\pm$ SD              | 47.8 $\pm$ 15                   | 52.8 $\pm$ 14                 | <b>0.003</b>     |
| Sex (male), n (%)                       | 50 (52)                         | 122 (51)                      | 0.906            |
| Symptom duration (months), median (IQR) | 9.5 (3-34)                      | 9.4 (4-31)                    | 0.628            |
| <b>Disease activity</b>                 |                                 |                               |                  |
| Swollen joint count (66), median (IQR)  | 3 (1-5)                         | 3 (2-6)                       | 0.091            |
| Tender joint count (68), median (IQR)   | 4 (2-9)                         | 4 (2-9)                       | 0.830            |
| Psoriasis, n (%)                        | 81 (84)                         | 205 (85)                      |                  |
| BSA in case of psoriasis, median (IQR)  | 2.5 (1-4)                       | 3 (1.5-5.5)                   | 0.280            |
| Enthesitis, n (%)                       | 38 (39)                         | 93 (39)                       |                  |
| LEI in case of enthesitis, median (IQR) | 2 (1-3)                         | 2 (1-3)                       | 0.595            |
| HAQ, median (IQR)                       | 0.88 (0.44-1.25)                | 0.63 (0.38-1.00)              | <b>0.037</b>     |
| Global (VAS), median (IQR)              | 51 (35-72)                      | 46 (23-65)                    | <b>0.049</b>     |
| Pain (VAS), median (IQR)                | 62 (41-78)                      | 48 (23-69)                    | <b>0.001</b>     |
| CRP (mg/L), median (IQR)                | 6 (1-11)                        | 5 (1-12)                      | 0.910            |

P < 0.05 was considered significant and is shown in bold. Patients not categorized in a group due to missing data are compared to those with an assigned MDA group. MDA: minimal disease activity; BSA: Body Surface Area; LEI: Leeds Enthesitis Index; HAQ: Health Assessment Questionnaire; VAS: visual analogue scale; CRP: C-reactive protein.

**Supplementary Table S2.** Complete case analysis of estimated mean differences in patient-reported outcomes during follow-up (1-3 years) for minimal disease activity groups

|                             |     | Sustained MDA<br>(n=104) |                |                                                 | Non-sustained MDA (n=60) |                  |                                                 | No MDA (n=76) |                  |                                                 |
|-----------------------------|-----|--------------------------|----------------|-------------------------------------------------|--------------------------|------------------|-------------------------------------------------|---------------|------------------|-------------------------------------------------|
|                             |     | $\beta$                  | (95% CI)       | Bonferroni<br>corrected<br>P-value <sup>a</sup> | $\beta$                  | (95% CI)         | Bonferroni<br>corrected<br>P-value <sup>a</sup> | $\beta$       | (95% CI)         | Bonferroni<br>corrected<br>P-value <sup>a</sup> |
| Pain (VAS)                  | Ref | 15.80                    | (10.71, 20.89) | <b>&lt;0.001</b>                                | 35.38                    | (30.57, 40.18)   | <b>&lt;0.001</b>                                | 35.38         | (30.57, 40.18)   | <b>&lt;0.001</b>                                |
| Fatigue (BRAFF-MDQ)         | Ref | 7.74                     | (3.99, 11.50)  | <b>0.001</b>                                    | 17.74                    | (14.22, 21.27)   | <b>&lt;0.001</b>                                | 17.74         | (14.22, 21.27)   | <b>&lt;0.001</b>                                |
| Functional ability (HAQ-DI) | Ref | 0.31                     | (0.19, 0.43)   | <b>&lt;0.001</b>                                | 0.81                     | (0.70, 0.92)     | <b>&lt;0.001</b>                                | 0.81          | (0.70, 0.92)     | <b>&lt;0.001</b>                                |
| Health status (EQ-5D-5L)    | Ref | -0.08                    | (-0.13, -0.03) | <b>0.046</b>                                    | -0.24                    | (-0.29, -0.20)   | <b>&lt;0.001</b>                                | -0.24         | (-0.29, -0.20)   | <b>&lt;0.001</b>                                |
| PCS (SF-36)                 | Ref | -6.39                    | (-8.40, -4.39) | <b>&lt;0.001</b>                                | -13.40                   | (-15.31, -11.49) | <b>&lt;0.001</b>                                | -13.40        | (-15.31, -11.49) | <b>&lt;0.001</b>                                |
| MCS (SF-36)                 | Ref | -3.30                    | (-6.02, -0.59) | 0.33                                            | -8.02                    | (-10.59, -5.44)  | <b>&lt;0.001</b>                                | -8.02         | (-10.59, -5.44)  | <b>&lt;0.001</b>                                |
| Anxiety (HADS)              | Ref | 1.46                     | (0.35, 2.57)   | 0.19                                            | 2.96                     | (1.89, 4.02)     | <b>&lt;0.001</b>                                | 2.96          | (1.89, 4.02)     | <b>&lt;0.001</b>                                |
| Depression (HADS)           | Ref | 1.15                     | (0.11, 2.20)   | 0.58                                            | 3.74                     | (2.74, 4.75)     | <b>&lt;0.001</b>                                | 3.74          | (2.74, 4.75)     | <b>&lt;0.001</b>                                |

<sup>a</sup>n=19.  $\beta$  shows the estimated mean difference comparing the sustained MDA group with the other two groups over the course of 1-3 years of follow-up. All analyses were adjusted for age, sex and SJC. P < 0.05 was considered significant and is shown in bold. MDA: minimal disease activity; VAS: Visual Analogue Scale; BRAFF-MDQ: Bristol Rheumatoid Arthritis Fatigue-Multidimensional Questionnaire; HAQ-DI: Health Assessment Questionnaire-Disability Index; EQ-5D-5L: European Quality of life 5-Dimensions 5-Levels, SF-36: 36-item Short Form Health Survey (PCS: Physical Component Summary score, MCS: Mental Component Summary score), HADS: Hospital Anxiety and Depression Scale.

**Supplementary Table S3.** Patient-reported outcomes after 2 and 3 years categorized by MDA group

| PROs                                                 | Time | Sustained MDA<br>(n=104) | Non-sustained<br>MDA (n=60) | No MDA<br>(n=76) |
|------------------------------------------------------|------|--------------------------|-----------------------------|------------------|
| <b>Pain (VAS)</b><br>MCID ≥10 [1]                    | T24  | 8 (2-21)                 | 18 (5-34)                   | 44 (25-71)       |
|                                                      | T36  | 6 (2-23)                 | 30 (10-38)                  | 47 (25-70)       |
| <b>Fatigue (BRAFF-MDQ)</b><br>MCID ≥7.4 [2]          | T24  | 15.1 (10.6)              | 18.0 (10.6)                 | 28.1 (15.1)      |
|                                                      | T36  | 13.7 (8.2)               | 17.3 (10.8)                 | 26.4 (13.7)      |
| <b>Functional ability (HAQ-DI)</b><br>MCID ≥0.35 [3] | T24  | 0.13 (0.00-0.38)         | 0.44 (0.25-0.81)            | 1.13 (0.75-1.50) |
|                                                      | T36  | 0.06 (0.00-0.38)         | 0.44 (0.13-0.75)            | 1.06 (0.75-1.38) |
| <b>Health status (EQ-5D-5L)</b><br>MCID ≥0.07 [4]    | T24  | 0.87 (0.07)              | 0.83 (0.07)                 | 0.64 (0.27)      |
|                                                      | T36  | 0.87 (0.09)              | 0.82 (0.09)                 | 0.67 (0.22)      |
| <b>PCS (SF-36)</b><br>MCID ≥2.5-5 [5]                | T24  | 48.8 (6.9)               | 44.7 (7.3)                  | 36.0 (9.1)       |
|                                                      | T36  | 49.6 (6.2)               | 44.6 (7.0)                  | 36.4 (8.3)       |
| <b>MCS (SF-36)</b><br>MCID ≥2.5-5 [5]                | T24  | 51.4 (8.2)               | 49.2 (9.2)                  | 44.7 (10.7)      |
|                                                      | T36  | 53.1 (6.5)               | 51.4 (8.2)                  | 45.7 (10.9)      |
| <b>Anxiety score (HADS)</b><br>MCID ≥1.7 [6]         | T24  | 3.1 (3.0)                | 4.2 (4.0)                   | 5.9 (4.4)        |
|                                                      | T36  | 3.2 (2.4)                | 3.7 (3.8)                   | 5.5 (4.5)        |
| <b>Depression score (HADS)</b><br>MCID ≥1.7 [6]      | T24  | 2.2 (2.7)                | 2.5 (2.3)                   | 6.0 (4.9)        |
|                                                      | T36  | 1.7 (2.0)                | 2.7 (2.4)                   | 4.8 (4.5)        |

Results are shown as mean (standard deviation) or median (interquartile range). MDA: minimal disease activity; VAS: Visual Analogue Scale; BRAFF-MDQ: Bristol Rheumatoid Arthritis Fatigue-Multidimensional Questionnaire; HAQ-DI: Health Assessment Questionnaire–Disability Index; EQ-5D-5L: European Quality of life 5-Dimensions 5-Levels, SF-36: 36-item Short Form Health Survey (PCS: Physical Component Summary score, MCS: Mental Component Summary score), HADS: Hospital Anxiety and Depression Scale. MCID: minimum clinical important difference.

**Supplementary Table S4.** Residual disease activity of MDA groups at 1, 2 and 3 years

|                            | 1 year                      |                                    |                     | 2 years                    |                                    |                     | 3 years                    |                                    |                     |
|----------------------------|-----------------------------|------------------------------------|---------------------|----------------------------|------------------------------------|---------------------|----------------------------|------------------------------------|---------------------|
|                            | Sustained<br>MDA<br>(n=104) | Non-<br>sustained<br>MDA<br>(n=60) | No<br>MDA<br>(n=76) | Sustained<br>MDA<br>(n=95) | Non-<br>sustained<br>MDA<br>(n=56) | No<br>MDA<br>(n=68) | Sustained<br>MDA<br>(n=93) | Non-<br>sustained<br>MDA<br>(n=48) | No<br>MDA<br>(n=64) |
| <b>SJC &gt;1</b>           | 11 (11)                     | 17 (28)                            | 29 (38)             | 11 (12)                    | 11 (20)                            | 20 (31)             | 15 (17)                    | 7 (17)                             | 23 (39)             |
| <b>TJC &gt;1</b>           | 14 (13)                     | 24 (40)                            | 56 (74)             | 10 (11)                    | 21 (38)                            | 38 (58)             | 9 (10)                     | 11 (26)                            | 33 (56)             |
| <b>BSA &gt;3%</b>          | 13 (13)                     | 17 (29)                            | 22 (29)             | 14 (16)                    | 9 (16)                             | 15 (23)             | 6 (7)                      | 5 (12)                             | 17 (29)             |
| <b>LEI &gt;1</b>           | 1 (1)                       | 5 (8)                              | 24 (32)             | 1 (1)                      | 3 (5)                              | 18 (27)             | 1 (1)                      | 2 (5)                              | 18 (31)             |
| <b>HAQ &gt;0.5</b>         | 5 (5)                       | 29 (50)                            | 55 (80)             | 8 (9)                      | 15 (29)                            | 43 (75)             | 10 (11)                    | 12 (29)                            | 45 (78)             |
| <b>Global (VAS) &gt;20</b> | 15 (14)                     | 45 (76)                            | 72 (96)             | 22 (23)                    | 28 (53)                            | 48 (76)             | 20 (22)                    | 25 (60)                            | 48 (83)             |
| <b>Pain (VAS) &gt;15</b>   | 20 (21)                     | 46 (79)                            | 72 (96)             | 28 (33)                    | 27 (51)                            | 57 (90)             | 27 (32)                    | 25 (64)                            | 51 (89)             |

n (%) of patients with residual disease activity. SJC: swollen joint count, TJC: tender joint count, BSA: Body Surface Area, LEI: Leeds Enthesitis Index, HAQ: Health Assessment Questionnaire, VAS: Visual Analogue Scale, MDA: Minimal Disease Activity
